# Supplementary material for: Association of Surfactant Protein D Single Nucleotide Polymorphisms rs721917, rs2243639, rs3088308 with Recurrent Aphthous Stomatitis in Pakistani Population
Source: MDPI journal article supplement (doi:10.3390/genes14051119), 2023-05-22
Supplement: s1 [file s1]

**Table S1:** Data collection proforma used during sampling

|                                               |                                                                                                                                                                              |       |        |             |
|-----------------------------------------------|------------------------------------------------------------------------------------------------------------------------------------------------------------------------------|-------|--------|-------------|
| Patient Number ----- Date of Enrollment ----- |                                                                                                                                                                              |       |        |             |
| A- Demographic data                           |                                                                                                                                                                              |       |        |             |
| A-1                                           | File Number                                                                                                                                                                  |       |        |             |
| A-2                                           | Name of patient                                                                                                                                                              |       |        |             |
| A-3                                           | Father's name                                                                                                                                                                |       |        |             |
| A-4                                           | NIC number                                                                                                                                                                   |       |        |             |
| A-5                                           | Current Address                                                                                                                                                              |       |        |             |
| A-6                                           | Contact number                                                                                                                                                               |       |        |             |
| A-7                                           | Occupation                                                                                                                                                                   |       |        |             |
| A-8                                           | Age                                                                                                                                                                          |       |        |             |
| A-9                                           | Gender                                                                                                                                                                       | Male  | Female |             |
| B- Inclusion Criteria                         |                                                                                                                                                                              |       |        |             |
| Fulfills all 4 major criteria                 |                                                                                                                                                                              | Yes   | No     |             |
| B-1                                           | Single or multiple round/oval ulcers, shallow, regular margins, yellow-gray base, surrounded by erythematous margins, never preceded by vesicles, less than 1 cm in diameter | Yes   | No     |             |
| B-2                                           | At least 3 attacks of RAS within past 3 years, ulcers do not appear in the same focal site                                                                                   | Yes   | No     |             |
| B-3                                           | Painful lesion exacerbated by movement of ulcer affected area                                                                                                                | Yes   | No     |             |
| B-4                                           | Ulcer heals spontaneously without squeal, with or without treatment                                                                                                          | Yes   | No     |             |
| Fulfills at least 1 minor criteria            |                                                                                                                                                                              | Yes   | No     |             |
| B-5                                           | Family history of RAS                                                                                                                                                        | Yes   | No     |             |
| B-6                                           | First attack below 40 years of age                                                                                                                                           | Yes   | No     |             |
| B-7                                           | Non keratinized oral mucosa involved                                                                                                                                         | Yes   | No     |             |
| B-8                                           | Ulcer lasts few days to few weeks                                                                                                                                            | Yes   | No     |             |
| B-9                                           | Irregular recurrence pattern                                                                                                                                                 | Yes   | No     |             |
| B-10                                          | Non-specific inflammation on histopathology.                                                                                                                                 | Yes   | No     |             |
| B-11                                          | Triggered by hormonal changes, specific foods, drugs, infections or local trauma                                                                                             | Yes   | No     |             |
| B-12                                          | Documented deficiency of Ferritin, Iron, Folate, B-12, Zinc                                                                                                                  | Yes   | No     |             |
| B-13                                          | Non smoker or RAS developed after quitting smoking                                                                                                                           | Yes   | No     |             |
| B-14                                          | Heals with oral or systemic steroids                                                                                                                                         | Yes   | No     |             |
| C- Exclusion Criteria                         |                                                                                                                                                                              |       |        |             |
| C-1                                           | History of COPD                                                                                                                                                              | Yes   | No     |             |
| C-2                                           | History of Asthma                                                                                                                                                            | Yes   | No     |             |
| C-3                                           | Severe anemia (< 8 gm/dl)                                                                                                                                                    | Yes   | No     |             |
| C-4                                           | Inflammatory Bowel Disease                                                                                                                                                   | Yes   | No     |             |
| C-5                                           | Acute Infections                                                                                                                                                             | Yes   | No     |             |
| C-6                                           | Systemic Steroids                                                                                                                                                            | Yes   | No     |             |
| D- Ulcer Examination                          |                                                                                                                                                                              |       |        |             |
| D-1                                           | Type                                                                                                                                                                         | Minor | Major  | Herpetiform |
| D-2                                           | Number of ulcers                                                                                                                                                             |       |        |             |
| D-3                                           | Size (mm)                                                                                                                                                                    |       |        |             |
| D-4                                           | Site                                                                                                                                                                         |       |        |             |
| E- Additional Info                            |                                                                                                                                                                              |       |        |             |
| E-1                                           | Height (m)                                                                                                                                                                   |       |        |             |

|          |                             |              |                |           |
|----------|-----------------------------|--------------|----------------|-----------|
| E-2      | Weight (kg)                 |              |                |           |
| E-3      | Body mass index (BMI kg/m²) |              |                |           |
| E-4      | Smoking Status              | Never smoker | Current smoker | Ex-smoker |
| E-5      | Pack years of smoking       |              |                |           |
| E-6      | Pan chewing                 | Yes          |                | No        |
| E-7      | Niswar chewing              | Yes          |                | No        |
| E-8      | Gutka chewing               | Yes          |                | No        |
| F- Tests |                             |              |                |           |
| F-1      | Hemoglobin                  |              |                |           |
| F-2      | Total leukocyte count       |              |                |           |

**Table S2:** SP-D SNPs Genotypes distribution in study population by HWE

| SNP ID    | Recessive allele<br>(q) | Frequency of<br>recessive allele<br>(q <sup>2</sup> ) | Frequency of<br>dominant allele<br>(1-q=p) | HWE<br>1=p <sup>2</sup> +2pq+q <sup>2</sup> |
|-----------|-------------------------|-------------------------------------------------------|--------------------------------------------|---------------------------------------------|
| rs3088308 |                         |                                                       |                                            |                                             |
| Case      | 0.179                   | 0.032                                                 | 0.821                                      | 1.0                                         |
| Control   | 0.415                   | 0.172                                                 | 0.585                                      | 1.0                                         |
| rs721917  |                         |                                                       |                                            |                                             |
| Case      | 0.434                   | 0.188                                                 | 0.566                                      | 1.0                                         |
| Control   | 0.627                   | 0.393                                                 | 0.373                                      | 1.0                                         |
| rs2243639 |                         |                                                       |                                            |                                             |
| Case      | 0.575                   | 0.330                                                 | 0.425                                      | 1.0                                         |
| Control   | 0.623                   | 0.388                                                 | 0.377                                      | 1.0                                         |
